# Supplementary material for: Early endonuclease-mediated evasion of RNA sensing ensures efficient coronavirus replication
Source: PubMed Central journal article supplement (PMC5310923; doi:10.1371/journal.ppat.1006195), 2017-02-03
Supplement: ppat.1006195.s005.pdf [file ppat.1006195.s005.pdf]

**Supplemental Table 1** Primers and probes used in qRT-PCR.

| Gene                           | forward 5'-3'               | reverse 5'-3'               | probe 5'-3'                         |
|--------------------------------|-----------------------------|-----------------------------|-------------------------------------|
| IFN $\beta$                    | AGAAAGGACGAACATTCGGAAA      | TCCGTCATCTCCATAGGGATCTT     |                                     |
| GAPDH                          | TGCACCACCAACTGCTTAG         | GGATGCAGGGATGATGTTC         |                                     |
| TATA-box binding protein (Tbp) | ACGGACAACTGCGTTGATTTT       | ACTTAGCTGGGAAGCCCAACTT      |                                     |
| OAS1a                          | GGGAACAAGGGAATGGATGTTATGAGT | ATTTGGAGACCTCCTGGTGTGAAAAGT |                                     |
| OAS2                           | CTGGCTGACTGGAAACTGGTCATCT   | TTCAGACAGTTTTCGTTGGGTGTA    |                                     |
| OAS3                           | CACTGTCTGGAGCTGATTGTCCAGT   | GGTCTTGTCTTCTGCGCTGTAGTTGA  |                                     |
| RNase L                        | AGCCCAATCCCTACTCCAAGACTCTC  | ATCTTCGACAACGGTCTCTGACTTC   |                                     |
| nucleocapsid MHV               | GCCTCGCCAAAAGAGGACT         | GGGCCTCTCTTCCAAAACAC        | FAM- CAAACAAGCAGTGCCCAAGTGCAGC-BHQ1 |
| membrane protein HCoV-229E     | TTCCGACGTGCTCGAAC           | CCAACACGGTTGTGACAG          | FAM-TGGGCATGGAATCCTGAG-BHQ1         |
