# Supplementary material for: Early endonuclease-mediated evasion of RNA sensing ensures efficient coronavirus replication
Source: PubMed Central journal article supplement (PMC5310923; doi:10.1371/journal.ppat.1006195), 2017-02-03
Supplement: ppat.1006195.s006.pdf [file ppat.1006195.s006.pdf]

**Supplemental Table 2A** Preparation of genomic and subgenomic RNA standards

| standard               | name               | start 5' in MHV-A59* | end 3' in MHV-A59* | primer sequence 5'-3'                                                |
|------------------------|--------------------|----------------------|--------------------|----------------------------------------------------------------------|
| genomic and subgenomic | T7-MHV-leader15-fw | 15                   | 53                 | <b>ACTGTAATACGACTCACTATAG</b> GGCGTCCGTACGTACCCTCTCAACTCTAAAACCTTGTA |
| genomic                | MHV-ORF1-rev530    | 530                  | 509                | GGCTTAACCAAGACGGCACTAC                                               |
| subgenomic             | MHV-ns2-rev22259   | 22259                | 22241              | TCAAGCCCAGCATCCGTTA                                                  |

\* AY700211

T7 sequence is indicated in bold

**Supplemental Table 2B** Primers and probes used in the multiplex qRT-PCR reaction

| description                          | name                      | start 5' in MHV-A59* | dye           | primer sequence 5'-3'        | end 3' in MHV-A59* | quencher |
|--------------------------------------|---------------------------|----------------------|---------------|------------------------------|--------------------|----------|
| Fw Primer Genomic and Subgenomic RNA | Primer MHV-A59-L25fw      | 25                   |               | CGTACCCTCTCAACTCTAAAACCTTGTA | 53                 |          |
| Rev Primer Genomic RNA               | Primer MHV-A59-5utr143rev | 164                  |               | GGCAGAGAACGAAAGTCAAGGA       | 143                |          |
| Probe Genomic RNA                    | Probe MHV-5UTR-103        | 103                  | Yakima Yellow | CCCGCGGCCTGGCTTTGTC          | 122                | BHQ-1    |
| Rev Primer Subgenomic RNA            | Primer MHV-ns2-21778rev   | 21801                |               | GAAATGATTAGGC TTGTCAGCAA     | 21778              |          |
| Probe Subgenomic RNA **              | Probe MHV-ns2-sg-MGB      | 60-69&21752-21765    | FAM           | ATCTAATCTATACTTGTCTGGCT      | **                 | MGB      |

\* AY700211

\*\* overlapping Sequence Leader/ns2 subgenomic
